# Supplementary material
Source: Copernicus journal article supplement (doi:10.5194/ar-2026-15)
Supplement: Supplementary file 1 [file ar-2026-15-supplement.pdf]

# Supplementary information - Dispersion normalisation method for improved long-term trend evaluation: Heavy Metals in ambient air in the Czech Republic, Central Europe (2010–2021)

5 Adéla Holubová Šmejkalová<sup>1</sup>, Radek Lhotka<sup>1</sup>, Hana Škáchová<sup>1</sup>, Jan Pacner<sup>1</sup>

<sup>1</sup>Air Quality Division, Czech Hydrometeorological Institute, Prague, 143 06, Czech Republic

Correspondence to: Adéla Holubová Šmejkalová (adela.holubova@chmi.cz)

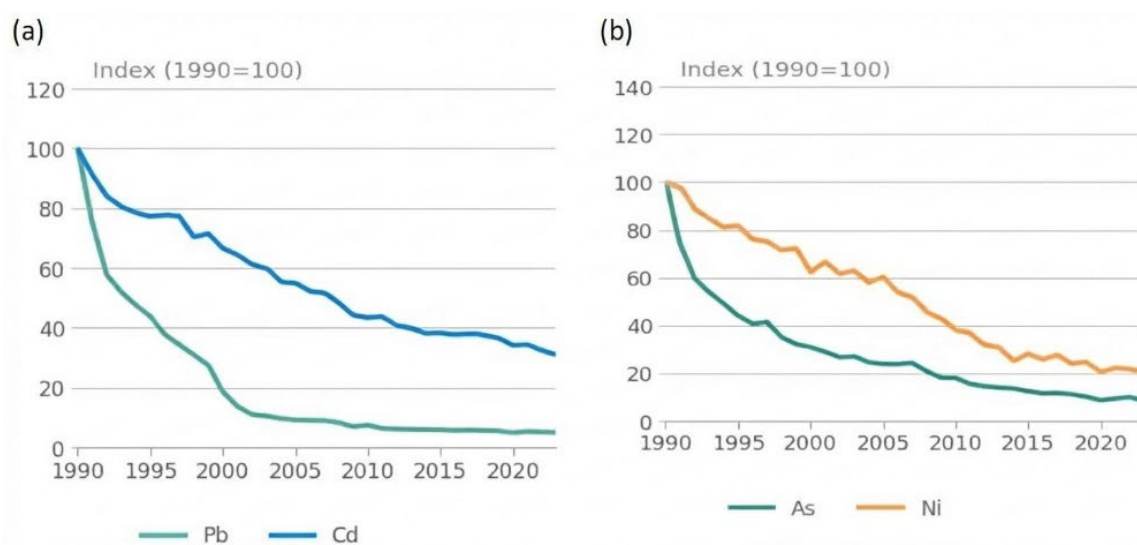

10 Figure S1: Indexed EU-27 emission trends for HMs. Reworked from (EEA, 2025).

Table S1: Basic characteristic of selected stations.

| Station name | Station abbreviation | Station type according EOI   | Coordiantes                     | Altitude [m] a.s.l. | Category |
|--------------|----------------------|------------------------------|---------------------------------|---------------------|----------|
| Brno-Líšeň   | BBN                  | background/urban/residential | 49° 12' 47.6" N 16° 40' 40.9" E | 340                 | BU       |
| Bílý Kříž    | BKR                  | background/rural/natural     | 49° 30' 9.4" N 18° 32' 18.8" E  | 890                 | BRM      |
| Červená hora | CER                  | background/rural/natural     | 49° 46' 37.7" N 17° 32' 31.0" E | 749                 | BRL      |

|                      |      |                                              |                                 |      |     |
|----------------------|------|----------------------------------------------|---------------------------------|------|-----|
| Churáňov             | CHU  | background/rural/natural                     | 49° 4' 6.4" N 13° 36' 53.3" E   | 1118 | BRM |
| Jizerka              | JIZ  | background/rural/natural                     | 50° 49' 11.8" N 15° 20' 40.2" E | 830  | BRM |
| Kladno-Švermov       | SKL  | background/urban/residential, industrial     | 50° 10' 2.7" N 14° 6' 21.7" E   | 219  | BU  |
| Košetice             | KOS  | background/rural/natural, agricultural       | 49° 34' 24.2" N 15° 4' 49.0" E  | 535  | BRL |
| Kuchařovice          | KUCH | background/rural/agricultural                | 48° 52' 52.9" N 16° 5' 8.9" E   | 334  | BRL |
| Lom                  | LOM  | background/rural/industrial                  | 50° 35' 8.8" N 13° 40' 24.3" E  | 265  | BRL |
| Ostrava-Poruba       | OPR  | background/sub-urban/residential             | 49° 49' 31.1" N 18° 9' 33.4" E  | 242  | BS  |
| Ostrava-Přívoz       | POP  | industrial/urban/industrial                  | 49° 51' 22.5" N 18° 16' 11.1" E | 207  | I   |
| Pardubice Dukla      | EPA  | background/urban/residential                 | 50° 1' 26.5" N 15° 45' 48.8" E  | 239  | BU  |
| Plzeň-Slovany        | PLL  | dopravní/urban/commercial                    | 49° 43' 56.8" N 13° 24' 8.3" E  | 340  | T   |
| Praha 4-Libuš        | LIB  | background/sub-urban/residential             | 50° 0' 26.3" N 14° 26' 45.4" E  | 301  | BS  |
| Svratouch            | ESV  | background/rural/natural                     | 49° 44' 6.3" N 16° 2' 3.1" E    | 735  | BRL |
| Ústí n.L.-<br>Kočkov | ULK  | background/sub-urban/residential;<br>natural | 50° 41' 0.7" N 14° 2' 28.3" E   | 367  | BS  |

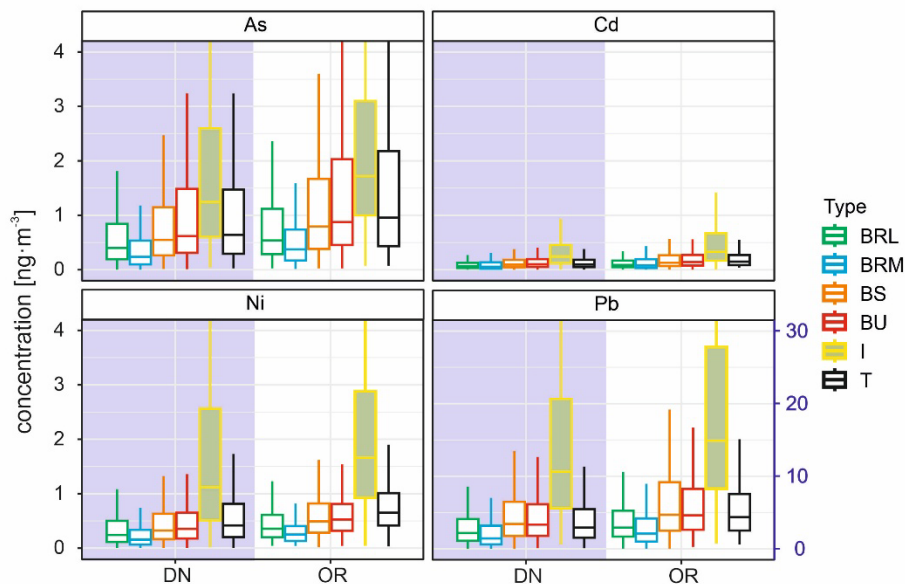

15 **Figure S2: HMDN and HMOR concentration overview at all station type, 2010–2021. Colours representing particular station type. Background Rural Lowland stations - BRL green, Background Rural Mountain stations - BRM are coloured lightblue, Background Suburban stations – BS orange, Background Urban stations - BU red, Industrial station I – yellow and Traffic station – T black. The violet background indicates HMDN concentration, and the white background indicates HMOR concentration. The Y-axis does not reach the maximum values.**

20

**Table S2: Correlation coefficient ( $R_s$ ) of  $As_{DN}$  concentrations. The  $R_s$  values  $> 0.7$  are highlighted in blue.**

|     | type    | BRL  | BRL  | BRL  | BRL  | BRL  | BRM  | BRM  | BRM  | BS   | BS   | BS   | BU   | BU   | BU   | I    | T    |
|-----|---------|------|------|------|------|------|------|------|------|------|------|------|------|------|------|------|------|
|     | station | CER  | KOS  | KUCH | LOM  | ESV  | BKR  | CHU  | JIZ  | OPO  | LIB  | ULK  | BBN  | SKL  | EPA  | OPR  | PLL  |
| BRL | CER     | 1.00 | 0.54 | 0.60 | 0.41 | 0.56 | 0.66 | 0.38 | 0.39 | 0.67 | 0.47 | 0.36 | 0.64 | 0.38 | 0.53 | 0.43 | 0.44 |
| BRL | KOS     | 0.54 | 1.00 | 0.69 | 0.54 | 0.61 | 0.37 | 0.60 | 0.48 | 0.45 | 0.75 | 0.55 | 0.60 | 0.55 | 0.63 | 0.35 | 0.64 |
| BRL | KUCH    | 0.60 | 0.69 | 1.00 | 0.43 | 0.64 | 0.41 | 0.44 | 0.33 | 0.46 | 0.54 | 0.35 | 0.77 | 0.40 | 0.63 | 0.36 | 0.48 |
| BRL | LOM     | 0.41 | 0.54 | 0.43 | 1.00 | 0.38 | 0.30 | 0.42 | 0.48 | 0.47 | 0.74 | 0.66 | 0.36 | 0.76 | 0.48 | 0.49 | 0.76 |
| BRL | ESV     | 0.56 | 0.61 | 0.64 | 0.38 | 1.00 | 0.43 | 0.35 | 0.40 | 0.46 | 0.47 | 0.33 | 0.65 | 0.35 | 0.65 | 0.39 | 0.41 |
| BRM | BKR     | 0.66 | 0.37 | 0.41 | 0.30 | 0.43 | 1.00 | 0.26 | 0.32 | 0.60 | 0.31 | 0.22 | 0.51 | 0.28 | 0.66 | 0.20 | 0.31 |
| BRM | CHU     | 0.38 | 0.60 | 0.44 | 0.42 | 0.35 | 0.26 | 1.00 | 0.40 | 0.23 | 0.52 | 0.42 | 0.41 | 0.34 | 0.40 | 0.22 | 0.53 |
| BRM | JIZ     | 0.39 | 0.48 | 0.33 | 0.48 | 0.40 | 0.32 | 0.40 | 1.00 | 0.27 | 0.45 | 0.58 | 0.33 | 0.36 | 0.44 | 0.30 | 0.44 |
| BS  | OPO     | 0.67 | 0.45 | 0.46 | 0.47 | 0.46 | 0.60 | 0.23 | 0.27 | 1.00 | 0.50 | 0.36 | 0.48 | 0.54 | 0.40 | 0.82 | 0.47 |
| BS  | LIB     | 0.47 | 0.75 | 0.54 | 0.74 | 0.47 | 0.31 | 0.52 | 0.45 | 0.50 | 1.00 | 0.64 | 0.45 | 0.80 | 0.54 | 0.17 | 0.83 |
| BS  | ULK     | 0.36 | 0.55 | 0.35 | 0.66 | 0.33 | 0.22 | 0.42 | 0.58 | 0.36 | 0.64 | 1.00 | 0.30 | 0.59 | 0.38 | 0.36 | 0.61 |
| BU  | BBN     | 0.64 | 0.60 | 0.77 | 0.36 | 0.65 | 0.51 | 0.41 | 0.33 | 0.48 | 0.45 | 0.30 | 1.00 | 0.32 | 0.59 | 0.39 | 0.40 |

|    |     |      |      |      |      |      |      |      |      |      |      |      |      |      |      |      |      |
|----|-----|------|------|------|------|------|------|------|------|------|------|------|------|------|------|------|------|
| BU | SKL | 0.38 | 0.55 | 0.40 | 0.76 | 0.35 | 0.28 | 0.34 | 0.36 | 0.54 | 0.80 | 0.59 | 0.32 | 1.00 | 0.41 | 0.32 | 0.79 |
| BU | EPA | 0.53 | 0.63 | 0.63 | 0.48 | 0.65 | 0.66 | 0.40 | 0.44 | 0.40 | 0.54 | 0.38 | 0.59 | 0.41 | 1.00 | 0.39 | 0.48 |
| I  | OPR | 0.61 | 0.35 | 0.36 | 0.49 | 0.39 | 0.20 | 0.22 | 0.30 | 0.82 | 0.17 | 0.36 | 0.39 | 0.32 | 0.39 | 1.00 | 0.46 |
| T  | PLL | 0.44 | 0.64 | 0.48 | 0.76 | 0.41 | 0.31 | 0.53 | 0.44 | 0.47 | 0.83 | 0.61 | 0.40 | 0.79 | 0.48 | 0.46 | 1.00 |

**Table S3: Correlation coefficient ( $R_s$ ) of Cd<sub>DN</sub> concentrations. The  $R_s$  values > 0.7 are highlighted in blue.**

|     | type    | BRL  | BRL  | BRL  | BRL  | BRL  | BRM  | BRM  | BRM  | BS   | BS   | BS   | BU   | BU   | BU   | I    | T    |
|-----|---------|------|------|------|------|------|------|------|------|------|------|------|------|------|------|------|------|
|     | station | CER  | KOS  | KUCH | LOM  | ESV  | BKR  | CHU  | JIZ  | OPO  | LIB  | ULK  | BBN  | SKL  | EPA  | OPR  | PLL  |
| BRL | CER     | 1.00 | 0.57 | 0.65 | 0.50 | 0.64 | 0.66 | 0.45 | 0.25 | 0.69 | 0.49 | 0.54 | 0.72 | 0.40 | 0.55 | 0.66 | 0.44 |
| BRL | KOS     | 0.57 | 1.00 | 0.71 | 0.68 | 0.76 | 0.44 | 0.66 | 0.33 | 0.54 | 0.75 | 0.73 | 0.68 | 0.65 | 0.76 | 0.56 | 0.69 |
| BRL | KUCH    | 0.65 | 0.71 | 1.00 | 0.61 | 0.69 | 0.52 | 0.51 | 0.18 | 0.56 | 0.59 | 0.59 | 0.81 | 0.52 | 0.71 | 0.54 | 0.57 |
| BRL | LOM     | 0.50 | 0.68 | 0.61 | 1.00 | 0.62 | 0.37 | 0.55 | 0.41 | 0.45 | 0.70 | 0.76 | 0.56 | 0.70 | 0.70 | 0.48 | 0.73 |
| BRL | ESV     | 0.64 | 0.76 | 0.69 | 0.62 | 1.00 | 0.49 | 0.53 | 0.40 | 0.55 | 0.61 | 0.64 | 0.71 | 0.57 | 0.75 | 0.58 | 0.57 |
| BRM | BKR     | 0.66 | 0.44 | 0.52 | 0.37 | 0.49 | 1.00 | 0.36 | 0.15 | 0.58 | 0.36 | 0.38 | 0.59 | 0.27 | 0.44 | 0.60 | 0.35 |
| BRM | CHU     | 0.45 | 0.66 | 0.51 | 0.55 | 0.53 | 0.36 | 1.00 | 0.30 | 0.37 | 0.62 | 0.60 | 0.49 | 0.52 | 0.54 | 0.42 | 0.63 |
| BRM | JIZ     | 0.25 | 0.33 | 0.18 | 0.41 | 0.40 | 0.15 | 0.30 | 1.00 | 0.23 | 0.36 | 0.37 | 0.23 | 0.39 | 0.34 | 0.29 | 0.42 |
| BS  | OPO     | 0.69 | 0.54 | 0.56 | 0.45 | 0.55 | 0.58 | 0.37 | 0.23 | 1.00 | 0.50 | 0.49 | 0.63 | 0.51 | 0.53 | 0.85 | 0.44 |
| BS  | LIB     | 0.49 | 0.75 | 0.59 | 0.70 | 0.61 | 0.36 | 0.62 | 0.36 | 0.50 | 1.00 | 0.73 | 0.56 | 0.77 | 0.70 | 0.50 | 0.76 |
| BS  | ULK     | 0.54 | 0.73 | 0.59 | 0.76 | 0.64 | 0.38 | 0.60 | 0.37 | 0.49 | 0.73 | 1.00 | 0.58 | 0.66 | 0.67 | 0.49 | 0.66 |
| BU  | BBN     | 0.72 | 0.68 | 0.81 | 0.56 | 0.71 | 0.59 | 0.49 | 0.23 | 0.63 | 0.56 | 0.58 | 1.00 | 0.48 | 0.70 | 0.63 | 0.53 |
| BU  | SKL     | 0.40 | 0.65 | 0.52 | 0.70 | 0.57 | 0.27 | 0.52 | 0.39 | 0.51 | 0.77 | 0.66 | 0.48 | 1.00 | 0.65 | 0.49 | 0.72 |
| BU  | EPA     | 0.55 | 0.76 | 0.71 | 0.70 | 0.75 | 0.44 | 0.54 | 0.34 | 0.53 | 0.70 | 0.67 | 0.70 | 0.65 | 1.00 | 0.55 | 0.67 |
| I   | OPR     | 0.66 | 0.56 | 0.54 | 0.48 | 0.58 | 0.60 | 0.42 | 0.29 | 0.85 | 0.50 | 0.49 | 0.63 | 0.49 | 0.55 | 1.00 | 0.46 |
| T   | PLL     | 0.44 | 0.69 | 0.57 | 0.73 | 0.57 | 0.35 | 0.63 | 0.42 | 0.44 | 0.76 | 0.66 | 0.53 | 0.72 | 0.67 | 0.46 | 1.00 |

25 **Table S4: Correlation coefficient ( $R_s$ ) of Ni<sub>DN</sub> concentrations. The  $R_s$  values > 0.7 are highlighted in blue.**

|     | type    | BRL  | BRL  | BRL  | BRL  | BRL  | BRM  | BRM  | BRM  | BS   | BS   | BS   | BU   | BU   | BU   | I    | T    |
|-----|---------|------|------|------|------|------|------|------|------|------|------|------|------|------|------|------|------|
|     | station | CER  | KOS  | KUCH | LOM  | ESV  | BKR  | CHU  | JIZ  | OPO  | LIB  | ULK  | BBN  | SKL  | EPA  | OPR  | PLL  |
| BRL | CER     | 1.00 | 0.41 | 0.34 | 0.36 | 0.54 | 0.30 | 0.40 | 0.44 | 0.33 | 0.31 | 0.45 | 0.27 | 0.40 | 0.31 | 0.25 | 0.29 |
| BRL | KOS     | 0.33 | 1.00 | 0.49 | 0.44 | 0.43 | 0.29 | 0.47 | 0.44 | 0.31 | 0.48 | 0.47 | 0.45 | 0.47 | 0.49 | 0.28 | 0.47 |
| BRL | KUCH    | 0.41 | 0.49 | 1.00 | 0.40 | 0.45 | 0.38 | 0.35 | 0.35 | 0.31 | 0.36 | 0.35 | 0.51 | 0.29 | 0.46 | 0.22 | 0.38 |
| BRL | LOM     | 0.34 | 0.44 | 0.40 | 1.00 | 0.40 | 0.29 | 0.44 | 0.53 | 0.25 | 0.47 | 0.52 | 0.41 | 0.49 | 0.45 | 0.25 | 0.56 |
| BRL | ESV     | 0.36 | 0.43 | 0.45 | 0.40 | 1.00 | 0.37 | 0.37 | 0.44 | 0.33 | 0.38 | 0.36 | 0.45 | 0.35 | 0.53 | 0.30 | 0.36 |

|     |     |      |      |      |      |      |      |      |      |      |      |      |      |      |      |      |      |
|-----|-----|------|------|------|------|------|------|------|------|------|------|------|------|------|------|------|------|
| BRM | BKR | 0.54 | 0.29 | 0.38 | 0.29 | 0.37 | 1.00 | 0.26 | 0.33 | 0.44 | 0.28 | 0.24 | 0.44 | 0.26 | 0.41 | 0.31 | 0.28 |
| BRM | CHU | 0.30 | 0.47 | 0.35 | 0.44 | 0.37 | 0.26 | 1.00 | 0.39 | 0.24 | 0.44 | 0.43 | 0.31 | 0.44 | 0.39 | 0.29 | 0.50 |
| BRM | JIZ | 0.40 | 0.44 | 0.35 | 0.53 | 0.44 | 0.33 | 0.39 | 1.00 | 0.30 | 0.44 | 0.48 | 0.35 | 0.35 | 0.51 | 0.32 | 0.47 |
| BS  | OPO | 0.44 | 0.31 | 0.31 | 0.25 | 0.33 | 0.44 | 0.24 | 0.30 | 1.00 | 0.29 | 0.28 | 0.37 | 0.27 | 0.34 | 0.53 | 0.26 |
| BS  | LIB | 0.33 | 0.48 | 0.36 | 0.47 | 0.38 | 0.28 | 0.44 | 0.44 | 0.29 | 1.00 | 0.49 | 0.37 | 0.51 | 0.48 | 0.25 | 0.50 |
| BS  | ULK | 0.31 | 0.47 | 0.35 | 0.52 | 0.36 | 0.24 | 0.43 | 0.48 | 0.28 | 0.49 | 1.00 | 0.36 | 0.47 | 0.44 | 0.29 | 0.49 |
| BU  | BBN | 0.45 | 0.45 | 0.51 | 0.41 | 0.45 | 0.44 | 0.31 | 0.35 | 0.37 | 0.37 | 0.36 | 1.00 | 0.33 | 0.48 | 0.33 | 0.40 |
| BU  | SKL | 0.27 | 0.47 | 0.29 | 0.49 | 0.35 | 0.26 | 0.44 | 0.35 | 0.27 | 0.51 | 0.47 | 0.33 | 1.00 | 0.42 | 0.28 | 0.50 |
| BU  | EPA | 0.40 | 0.49 | 0.46 | 0.45 | 0.53 | 0.41 | 0.39 | 0.51 | 0.34 | 0.48 | 0.44 | 0.48 | 0.42 | 1.00 | 0.32 | 0.50 |
| I   | OPR | 0.31 | 0.28 | 0.22 | 0.25 | 0.30 | 0.31 | 0.29 | 0.32 | 0.53 | 0.25 | 0.29 | 0.33 | 0.28 | 0.31 | 1.00 | 0.31 |
| T   | PLL | 0.25 | 0.47 | 0.38 | 0.56 | 0.36 | 0.28 | 0.50 | 0.47 | 0.26 | 0.50 | 0.49 | 0.40 | 0.50 | 0.49 | 0.31 | 1.00 |

**Table S5: Correlation coefficient (Rs) of Pb<sub>DN</sub> concentrations. The Rs values > 0.7 are highlighted in blue.**

|     | type    | BRL  | BRL  | BRL  | BRL  | BRL  | BRM  | BRM  | BRM  | BS   | BS   | BS   | BU   | BU   | BU   | I    | T    |
|-----|---------|------|------|------|------|------|------|------|------|------|------|------|------|------|------|------|------|
|     | station | CER  | KOS  | KUCH | LOM  | ESV  | BKR  | CHU  | JIZ  | OPO  | LIB  | ULK  | BBN  | SKL  | EPA  | OPR  | PLL  |
| BRL | CER     | 1.00 | 0.59 | 0.66 | 0.46 | 0.67 | 0.68 | 0.43 | 0.53 | 0.68 | 0.46 | 0.52 | 0.72 | 0.39 | 0.58 | 0.61 | 0.45 |
| BRL | KOS     | 0.59 | 1.00 | 0.72 | 0.66 | 0.77 | 0.43 | 0.67 | 0.60 | 0.52 | 0.73 | 0.74 | 0.67 | 0.64 | 0.78 | 0.49 | 0.67 |
| BRL | KUCH    | 0.66 | 0.72 | 1.00 | 0.57 | 0.71 | 0.51 | 0.47 | 0.49 | 0.55 | 0.55 | 0.57 | 0.79 | 0.48 | 0.71 | 0.48 | 0.56 |
| BRL | LOM     | 0.46 | 0.66 | 0.57 | 1.00 | 0.60 | 0.33 | 0.57 | 0.68 | 0.39 | 0.69 | 0.78 | 0.54 | 0.69 | 0.68 | 0.44 | 0.73 |
| BRL | ESV     | 0.67 | 0.77 | 0.71 | 0.60 | 1.00 | 0.49 | 0.54 | 0.66 | 0.54 | 0.58 | 0.64 | 0.74 | 0.54 | 0.77 | 0.56 | 0.58 |
| BRM | BKR     | 0.68 | 0.43 | 0.51 | 0.33 | 0.49 | 1.00 | 0.35 | 0.37 | 0.58 | 0.36 | 0.36 | 0.57 | 0.27 | 0.45 | 0.53 | 0.36 |
| BRM | CHU     | 0.43 | 0.67 | 0.47 | 0.57 | 0.54 | 0.35 | 1.00 | 0.53 | 0.32 | 0.63 | 0.62 | 0.46 | 0.55 | 0.54 | 0.37 | 0.66 |
| BRM | JIZ     | 0.53 | 0.60 | 0.49 | 0.68 | 0.66 | 0.37 | 0.53 | 1.00 | 0.42 | 0.56 | 0.69 | 0.53 | 0.59 | 0.65 | 0.46 | 0.58 |
| BS  | OPO     | 0.68 | 0.52 | 0.55 | 0.39 | 0.54 | 0.58 | 0.32 | 0.42 | 1.00 | 0.42 | 0.46 | 0.60 | 0.46 | 0.52 | 0.77 | 0.42 |
| BS  | LIB     | 0.46 | 0.73 | 0.55 | 0.69 | 0.58 | 0.36 | 0.63 | 0.56 | 0.42 | 1.00 | 0.71 | 0.52 | 0.70 | 0.68 | 0.42 | 0.73 |
| BS  | ULK     | 0.52 | 0.74 | 0.57 | 0.78 | 0.64 | 0.36 | 0.62 | 0.69 | 0.46 | 0.71 | 1.00 | 0.56 | 0.68 | 0.68 | 0.46 | 0.68 |
| BU  | BBN     | 0.72 | 0.67 | 0.79 | 0.54 | 0.74 | 0.57 | 0.46 | 0.53 | 0.60 | 0.52 | 0.56 | 1.00 | 0.47 | 0.70 | 0.59 | 0.53 |
| BU  | SKL     | 0.39 | 0.64 | 0.48 | 0.69 | 0.54 | 0.27 | 0.55 | 0.59 | 0.46 | 0.70 | 0.68 | 0.47 | 1.00 | 0.63 | 0.49 | 0.71 |
| BU  | EPA     | 0.58 | 0.78 | 0.71 | 0.68 | 0.77 | 0.45 | 0.54 | 0.65 | 0.52 | 0.68 | 0.68 | 0.70 | 0.63 | 1.00 | 0.54 | 0.67 |
| I   | OPR     | 0.61 | 0.49 | 0.48 | 0.44 | 0.56 | 0.53 | 0.37 | 0.46 | 0.77 | 0.42 | 0.46 | 0.59 | 0.49 | 0.54 | 1.00 | 0.44 |
| T   | PLL     | 0.45 | 0.67 | 0.56 | 0.73 | 0.58 | 0.36 | 0.66 | 0.58 | 0.42 | 0.73 | 0.68 | 0.53 | 0.71 | 0.67 | 0.44 | 1.00 |

30 Table S6: Correlation coefficient (R<sub>s</sub>) of HM<sub>DN</sub> concentrations at BRL stations.

|             | CER_<br>_As | CER_<br>_Cd | CER_<br>_Ni | CER_<br>_Pb | KOS_<br>_As | KOS_<br>_Cd | KOS_<br>_Ni | KOS_<br>_Pb | KUC<br>H_As | KUCH<br>_Cd | KUC<br>H_Ni | KUC<br>H_Pb | LOM<br>_As | LOM<br>_Cd | LOM<br>_Ni | LOM<br>_Pb | ESV<br>_As | ESV<br>_Cd | ESV<br>_Ni | ESV<br>_Pb |
|-------------|-------------|-------------|-------------|-------------|-------------|-------------|-------------|-------------|-------------|-------------|-------------|-------------|------------|------------|------------|------------|------------|------------|------------|------------|
| CER_<br>As  | 1           | 0.69        | 0.52        | 0.76        |             |             |             |             |             |             |             |             |            |            |            |            |            |            |            |            |
| CER_<br>Cd  | 0.69        | 1           | 0.51        | 0.92        |             |             |             |             |             |             |             |             |            |            |            |            |            |            |            |            |
| CER_<br>Ni  | 0.52        | 0.51        | 1           | 0.56        |             |             |             |             |             |             |             |             |            |            |            |            |            |            |            |            |
| CER_<br>Pb  | 0.76        | 0.92        | 0.56        | 1           |             |             |             |             |             |             |             |             |            |            |            |            |            |            |            |            |
| KOS_<br>As  |             |             |             |             | 1           | 0.8         | 0.5         | 0.82        |             |             |             |             |            |            |            |            |            |            |            |            |
| KOS_<br>Cd  |             |             |             |             | 0.8         | 1           | 0.54        | 0.9         |             |             |             |             |            |            |            |            |            |            |            |            |
| KOS_<br>Ni  |             |             |             |             | 0.5         | 0.54        | 1           | 0.6         |             |             |             |             |            |            |            |            |            |            |            |            |
| KOS_<br>Pb  |             |             |             |             | 0.82        | 0.9         | 0.6         | 1           |             |             |             |             |            |            |            |            |            |            |            |            |
| KUCH<br>_As |             |             |             |             |             |             |             |             | 1           | 0.85        | 0.49        | 0.87        |            |            |            |            |            |            |            |            |
| KUCH<br>_Cd |             |             |             |             |             |             |             |             | 0.85        | 1           | 0.51        | 0.94        |            |            |            |            |            |            |            |            |
| KUCH<br>_Ni |             |             |             |             |             |             |             |             | 0.49        | 0.51        | 1           | 0.52        |            |            |            |            |            |            |            |            |
| KUCH<br>_Pb |             |             |             |             |             |             |             |             | 0.87        | 0.94        | 0.52        | 1           |            |            |            |            |            |            |            |            |
| LOM_<br>As  |             |             |             |             |             |             |             |             |             |             |             |             | 1          | 0.78       | 0.48       | 0.78       |            |            |            |            |
| LOM_<br>Cd  |             |             |             |             |             |             |             |             |             |             |             |             | 0.78       | 1          | 0.61       | 0.9        |            |            |            |            |
| LOM_<br>Ni  |             |             |             |             |             |             |             |             |             |             |             |             | 0.48       | 0.61       | 1          | 0.68       |            |            |            |            |
| LOM_<br>Pb  |             |             |             |             |             |             |             |             |             |             |             |             | 0.78       | 0.9        | 0.68       | 1          |            |            |            |            |
| ESV_<br>As  |             |             |             |             |             |             |             |             |             |             |             |             |            |            |            |            | 1          | 0.65       | 0.44       | 0.71       |
| ESV_<br>Cd  |             |             |             |             |             |             |             |             |             |             |             |             |            |            |            |            | 0.65       | 1          | 0.51       | 0.91       |
| ESV_<br>Ni  |             |             |             |             |             |             |             |             |             |             |             |             |            |            |            |            | 0.44       | 0.51       | 1          | 0.52       |
| ESV_<br>Pb  |             |             |             |             |             |             |             |             |             |             |             |             |            |            |            |            | 0.71       | 0.91       | 0.52       | 1          |

**Table S7: Correlation coefficient (Rs) of HM<sub>DN</sub> concentrations at BRM stations.**

|        | BKR_As | BKR_Cd | BKR_Ni | BKR_Pb | CHU_As | CHU_Cd | CHU_Ni | CHU_Pb | JIZ_As | JIZ_Cd | JIZ_Ni | JIZ_Pb |
|--------|--------|--------|--------|--------|--------|--------|--------|--------|--------|--------|--------|--------|
| BKR_As | 1      | 0.7    | 0.52   | 0.7    |        |        |        |        |        |        |        |        |
| BKR_Cd | 0.7    | 1      | 0.62   | 0.93   |        |        |        |        |        |        |        |        |
| BKR_Ni | 0.51   | 0.59   | 1      | 0.61   |        |        |        |        |        |        |        |        |
| BKR_Pb | 0.7    | 0.93   | 0.62   | 1      |        |        |        |        |        |        |        |        |
| CHU_As |        |        |        |        | 1      | 0.81   | 0.45   | 0.82   |        |        |        |        |
| CHU_Cd |        |        |        |        | 0.81   | 1      | 0.55   | 0.9    |        |        |        |        |
| CHU_Ni |        |        |        |        | 0.41   | 0.52   | 1      | 0.57   |        |        |        |        |
| CHU_Pb |        |        |        |        | 0.82   | 0.9    | 0.6    | 1      |        |        |        |        |
| JIZ_As |        |        |        |        |        |        |        |        | 1      | 0.59   | 0.57   | 0.85   |
| JIZ_Cd |        |        |        |        |        |        |        |        | 0.59   | 1      | 0.4    | 0.62   |
| JIZ_Ni |        |        |        |        |        |        |        |        | 0.54   | 0.4    | 1      | 0.59   |
| JIZ_Pb |        |        |        |        |        |        |        |        | 0.85   | 0.62   | 0.63   | 1      |

35

**Table S8: Correlation coefficient (Rs) of HM<sub>DN</sub> concentrations at BS stations.**

|        | OPO_As | OPO_Cd | OPO_Ni | OPO_Pb | LIB_As | LIB_Cd | LIB_Ni | LIB_Pb | ULK_As | ULK_Cd | ULK_Ni | ULK_Pb |
|--------|--------|--------|--------|--------|--------|--------|--------|--------|--------|--------|--------|--------|
| OPO_As | 1      | 0.67   | 0.59   | 0.7    |        |        |        |        |        |        |        |        |
| OPO_Cd | 0.67   | 1      | 0.6    | 0.9    |        |        |        |        |        |        |        |        |
| OPO_Ni | 0.59   | 0.6    | 1      | 0.64   |        |        |        |        |        |        |        |        |
| OPO_Pb | 0.7    | 0.9    | 0.64   | 1      |        |        |        |        |        |        |        |        |
| LIB_As |        |        |        |        | 1      | 0.78   | 0.46   | 0.72   |        |        |        |        |
| LIB_Cd |        |        |        |        | 0.78   | 1      | 0.55   | 0.87   |        |        |        |        |
| LIB_Ni |        |        |        |        | 0.46   | 0.55   | 1      | 0.63   |        |        |        |        |
| LIB_Pb |        |        |        |        | 0.72   | 0.87   | 0.63   | 1      |        |        |        |        |
| ULK_As |        |        |        |        |        |        |        |        | 1      | 0.74   | 0.43   | 0.78   |
| ULK_Cd |        |        |        |        |        |        |        |        | 0.74   | 1      | 0.57   | 0.9    |
| ULK_Ni |        |        |        |        |        |        |        |        | 0.43   | 0.57   | 1      | 0.61   |
| ULK_Pb |        |        |        |        |        |        |        |        | 0.78   | 0.9    | 0.61   | 1      |

**Table S9: Correlation coefficient (Rs) of HMDN concentrations at BU, I and T stations.**

|        | BBN_As | BBN_Cd | BBN_Ni | BBN_Pb | SKL_As | SKL_Cd | SKL_Ni | SKL_Pb | EPA_As | EPA_Cd | EPA_Ni | EPA_Pb | OPR_As | OPR_Cd | OPR_Ni | OPR_Pb | PLL_As | PLL_Cd | PLL_Ni | PPL_Pb |
|--------|--------|--------|--------|--------|--------|--------|--------|--------|--------|--------|--------|--------|--------|--------|--------|--------|--------|--------|--------|--------|
| BBN_As | 1      | 0.76   | 0.54   | 0.79   |        |        |        |        |        |        |        |        |        |        |        |        |        |        |        |        |
| BBN_Cd | 0.76   | 1      | 0.59   | 0.93   |        |        |        |        |        |        |        |        |        |        |        |        |        |        |        |        |

|            |      |      |      |      |      |      |      |      |      |      |      |      |      |      |      |      |      |      |      |      |
|------------|------|------|------|------|------|------|------|------|------|------|------|------|------|------|------|------|------|------|------|------|
| BBN_<br>Ni | 0.54 | 0.59 | 1    | 0.62 |      |      |      |      |      |      |      |      |      |      |      |      |      |      |      |      |
| BBN_<br>Pb | 0.79 | 0.93 | 0.62 | 1    |      |      |      |      |      |      |      |      |      |      |      |      |      |      |      |      |
| SKL_<br>As |      |      |      |      | 1    | 0.81 | 0.32 | 0.75 |      |      |      |      |      |      |      |      |      |      |      |      |
| SKL_<br>Cd |      |      |      |      | 0.81 | 1    | 0.49 | 0.88 |      |      |      |      |      |      |      |      |      |      |      |      |
| SKL_<br>Ni |      |      |      |      | 0.32 | 0.49 | 1    | 0.55 |      |      |      |      |      |      |      |      |      |      |      |      |
| SKL_<br>Pb |      |      |      |      | 0.75 | 0.88 | 0.55 | 1    |      |      |      |      |      |      |      |      |      |      |      |      |
| EPA_<br>As |      |      |      |      |      |      |      |      | 1    | 0.72 | 0.6  | 0.76 |      |      |      |      |      |      |      |      |
| EPA_<br>Cd |      |      |      |      |      |      |      |      | 0.72 | 1    | 0.63 | 0.92 |      |      |      |      |      |      |      |      |
| EPA_<br>Ni |      |      |      |      |      |      |      |      | 0.6  | 0.63 | 1    | 0.65 |      |      |      |      |      |      |      |      |
| EPA_<br>Pb |      |      |      |      |      |      |      |      | 0.76 | 0.92 | 0.65 | 1    |      |      |      |      |      |      |      |      |
| OPR_<br>As |      |      |      |      |      |      |      |      |      |      |      |      | 1    | 0.67 | 0.73 | 0.74 |      |      |      |      |
| OPR_<br>Cd |      |      |      |      |      |      |      |      |      |      |      |      | 0.67 | 1    | 0.52 | 0.88 |      |      |      |      |
| OPR_<br>Ni |      |      |      |      |      |      |      |      |      |      |      |      | 0.73 | 0.52 | 1    | 0.62 |      |      |      |      |
| OPR_<br>Pb |      |      |      |      |      |      |      |      |      |      |      |      | 0.74 | 0.88 | 0.62 | 1    |      |      |      |      |
| PLL_<br>As |      |      |      |      |      |      |      |      |      |      |      |      |      |      |      |      | 1    | 0.74 | 0.36 | 0.72 |
| PLL_<br>Cd |      |      |      |      |      |      |      |      |      |      |      |      |      |      |      |      | 0.74 | 1    | 0.46 | 0.72 |
| PLL_<br>Ni |      |      |      |      |      |      |      |      |      |      |      |      |      |      |      |      | 0.36 | 0.46 | 1    | 0.48 |
| PLL_<br>Pb |      |      |      |      |      |      |      |      |      |      |      |      |      |      |      |      | 0.72 | 0.72 | 0.48 | 1    |

40 **Table S10: The results of long-term trend analyses of  $HM_{DN}$  and HM concentrations for the individual stations. The overall trend is mentioned as a percentage increase/decrease per year, and the 95% confidence intervals in the slope are listed in [ ] %/year. Significance level:  $p < 0.001 = ***$ ,  $p < 0.01 = **$ ,  $p < 0.05 = *$  and  $p < 0.1 = +$ .**

|                   | As %/year               | Cd %/year                | Pb %/year                | Ni %/year                |
|-------------------|-------------------------|--------------------------|--------------------------|--------------------------|
| BRL               |                         |                          |                          |                          |
| KOS <sub>DN</sub> | -4.42[-5.53, -2.63] *** | -4.87 [-5.91, -3.75] *** | -4.57 [-5.68, -3.43] *** | -3.33[-34.92, -1.67] *** |

|                   |                          |                          |                           |                           |
|-------------------|--------------------------|--------------------------|---------------------------|---------------------------|
| KOS               | -4.92 [-5.95, -3.42] *** | -5.12 [-6.75, -3.5] ***  | -5.44 [-6.62, -4] ***     | -3.75[-4.94, -2.06] ***   |
| BKU <sub>DN</sub> | -4.09 [-5.21, -2.81] *** | -4.72 [-6.1, -3.34] ***  | -4.85 [-5.95, -3.61] ***  | -2.67 [-3.99, -0.34] *    |
| BKU               | -5.05[-6.11, -3.5] ***   | -5.72 [-7.06, -3.84] *** | -5.86 [-6.97, -4.68] ***  | -3.15 [-4.4, -1.16] **    |
| LOM <sub>DN</sub> | -1.89 [-4.12, 1.2]       | -4.43 [-5.52, -3.13] *** | -5.14 [-6.01, -3.93] ***  | -1.81 [-3, 0.02]<br>+     |
| LOM               | -2.16 [-3.99, -0.11] *   | -5.37 [-6.68, -3.68] *** | -5.44 [-6.62, -4.00] ***  | -2.04 [-3.12, -0.41] **   |
| ESV <sub>DN</sub> | -0.88 [-2.97, 1.66]      | -3.97 [-5.10, -2.43] *** | -4.01 [-4.95, -2.58] ***  | -0.99[-3.31, 12.3]        |
| ESV               | -3.23 [-4.83, -1.19] *** | -5.33 [-6.79, -3.87] *** | -5.22 [-6.49, -4.00] ***  | -1.73 [-3.43, 0.58]       |
| CER <sub>DN</sub> | -4.76 [-5.73, -3.62] *** | -5.88 [-6.79, -4.53] *** | -4.83 [-5.75, -3.83] ***  | -3.5[-4.82, -1.53] ***    |
| CER               | -5.34 [-6.37, -4.43] *** | -6.52 [-7.11, -5.54] *** | -5.78 [-6.51, -4.86] ***  | -3.95 [-5.15, -2.35] ***  |
| BRM               |                          |                          |                           |                           |
| BKR <sub>DN</sub> | -7.41 [-7.86, -6.97] *** | -5.84 [-6.42 -5.16] ***  | -5.17 [-5.94, -4.48] ***  | -3.15 [-4.48, -1.06]**    |
| BKR               | -7.61 [-8.34, -6.81] *** | -6.48 [-7.19, -5.7] ***  | -6.12 [-6.87, -5.31] ***  | -4.00 [-4.91, -2.1] ***   |
| CHU <sub>DN</sub> | -4.59 [-5.59, -3.39] *** | -5.58 [-7.13, -4.46] *** | -4.93 [-6.13, -3.75] ***  | -3.39 [-5, -1.49] **      |
| CHU               | -5.94[-7.07, -4.51] ***  | -6.35 [-8.17, -4.57] *** | -6.00 [-6.82, -4.81] ***  | -4.27[-5.52, -2.31] ***   |
| JIZ <sub>DN</sub> | -3.20 [-4.58, -1.62] *** | -7.3[-8.15, -5.91] ***   | -5.23 [-6.09, -4.14J] *** | -3.42 [-4.74, -1.74]***   |
| JIZ               | -4.27 [-5.31, -2.89] *** | -8.07 [-9.54, -6.68] *** | -5.60 [-652, -4.68] ***   | -4.17[-5.41, -2.64] ***   |
| BS                |                          |                          |                           |                           |
| ULK <sub>DN</sub> | -3.98 [-5.68, -2.32] *** | -5.67 [-6.7, -4.79] ***  | -5.36 [-6.38, -4.33] ***  | -3.45 [-4.71, -1.49] **   |
| ULK               | -3.96 [-5.35, -2.14] *** | -6.04 [-7.04, -4.87] *** | -5.32 [-6.22, -4.25] ***  | -3.47 [-4.55, -2] ***     |
| LIB <sub>DN</sub> | -5.07 [-6.72, -3.25] *** | -5.66 [-6.55, -4.67] *** | -6 [-6.72, -4.96] ***     | -3.42 [-4.53, -2.1] ***   |
| LIB               | -4.9 [-6.61, -3.21] ***  | -6.22 [-7.59, -482] ***  | -6.53 [-7.22, -5.49] ***  | -3.65 [-4.76, -2.31] ***  |
| OPO <sub>DN</sub> | -3.03 [-4.68, -1.34] *** | -5.91 [-6.86, -4.65] *** | -5.31 [-6.31, -4.32] ***  | -0.47 [-2.57, 2.41]       |
| OPO               | -3.61 [-5.31, -1.89] *** | -6.04 [-7.19, -4.98] *** | -5.81 [-7.05, -5.04] ***  | -2.05 [-3.74, -0.05] *    |
| BU                |                          |                          |                           |                           |
| BBN <sub>DN</sub> | -4.33 [-5.36, -3.22] *** | -5.5 [-6.35, -4.21] ***  | -5.07 [-5.85, -4.25] ***  | -4.64 [-5.42, -3.71] ***  |
| BBN               | -4.79 [-5.82, -3.75] *** | -5.83 [-7.03, -4.58] *** | -5.67 [-6.38, -4.53] ***  | -4.94 [-5.71, -3.76]r *** |
| EPA <sub>DN</sub> | -1.72 [-3.12, -0.04] *   | -4.99 [-6.1, -3.89] ***  | -4.97 [-6.12, -3.68] ***  | -3.33 [-4.56, -1.78] ***  |
| EPA               | -3.62 [-4.82, -1.94] *** | -5.84 [-6.92, -4.24] *** | -5.88 [-7.1, -4.46] ***   | -4.01 [-5.19, -2.77] ***  |
| SKL <sub>DN</sub> | -4.69 [-6.73, -1.94] *** | -5.28 [-6.4, -4.06] ***  | -6.51 [-7.21, -5.21] ***  | -3.45 [-4.57, -2.14] ***  |
| SKL               | -5.03 [-7.54, -2.84] *** | -5.63 [-6.67, -3.99] *** | -6.85 [-7.64, -5.8] ***   | -4.28[-5.23, -3.03] ***   |
| I                 |                          |                          |                           |                           |
| OPR <sub>DN</sub> | -3.73 [-4.87, -2.63] *** | -5.73 [-6.60, -4.73] *** | -4.95 [-5.82, -4.01] ***  | 0.74[-1.68, 4.14]         |
| OPR               | -4.41 [-5.66 -3.42] ***  | -6.19 [-7.44, -5.26] *** | -5.85 [-6.54, -5.09] ***  | 0.23[-1.8, 3.31]          |
| T                 |                          |                          |                           |                           |

|                   |                          |                          |                          |                          |
|-------------------|--------------------------|--------------------------|--------------------------|--------------------------|
| PLL <sub>DN</sub> | -4.54 [-6.31, -2.54] *** | -5.36 [-6.89, -4.08] *** | -5.86 [-6.77, -5.5] ***  | -5.02 [-5.92, -3.97] *** |
| PLL               | -5.09 [-6.41, -3] ***    | -6.04 [-7.16, -4.72] *** | -6.52 [-7.34, -5.49] *** | -4.81 [-5.84, -3.78] *** |

**Table S11: The maximal and minimal percentage difference between HM OR-DN yearly average concentration.**

| HM           | Station type | BRL | BRM | BS | BU | I  | T  |
|--------------|--------------|-----|-----|----|----|----|----|
| As OR-DN [%] | max          | 36  | 51  | 44 | 41 | 46 | 44 |
|              | min          | 12  | 19  | 10 | 20 | 7  | 9  |
| Cd OR-DN [%] | max          | 36  | 47  | 40 | 44 | 39 | 52 |
|              | min          | 13  | 21  | 11 | 8  | 8  | 20 |
| Ni OR-DN [%] | max          | 39  | 49  | 46 | 40 | 47 | 50 |
|              | min          | 23  | 20  | 20 | 20 | 18 | 27 |
| Pb OR-DN [%] | max          | 35  | 43  | 39 | 43 | 46 | 50 |
|              | min          | 13  | 19  | 18 | 9  | 15 | 8  |

45

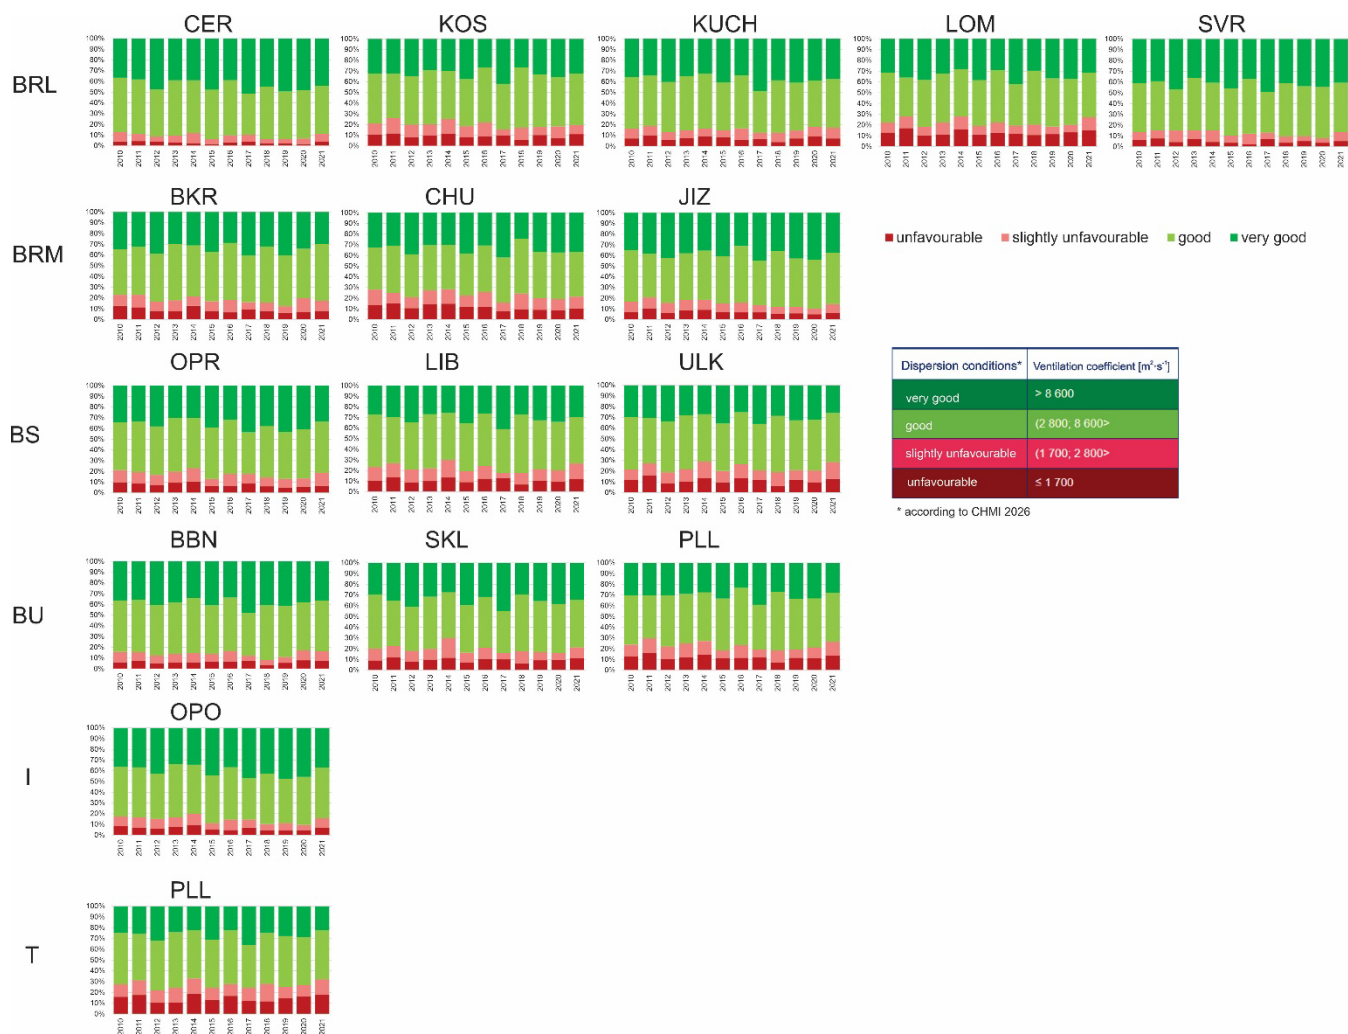

50 **Figure S3: Dispersion conditions evaluated by ventilation coefficient value according to method CHMI (2026) at individual stations 2011–2021.**
